# Supplementary material
Source: publisher figshare collection journal article supplement (https://acs.figshare.com/ndownloader/files/13168190)
Supplement: Supplementary file 1 [file 13168190]

# **Electronic Supplementary Information**

## **Chemical Sensing at the Robot Fingertips: Towards Automated Taste Discrimination in Food Samples**

Bianca Ciui<sup>1,2‡</sup>, Aida Martin<sup>1‡</sup>, Rupesh K. Mishra<sup>1‡</sup>, Tatsuo Nakagawa<sup>1</sup>, Thomas J. Dawkins<sup>1</sup>, Mengjia Lyu<sup>1</sup>,  
Cecilia Cristea<sup>2</sup>, Robert Sandulescu<sup>2</sup>, Joseph Wang<sup>1\*</sup>

<sup>1</sup>*Department of Nanoengineering, University of California, San Diego La Jolla, CA 92093, USA.*

<sup>2</sup>*Analytical Chemistry Department, UMF Cluj-Napoca 400349, Romania*

\*E-mail: josephwang@ucsd.edu

### **Table of Content**

#### **1. Experimental Videos.**

**Video S1.** Caffeine detection with robotic hand.

**Video S2.** Sweetness detection with robotic hand.

**2. Figure S1: Robotic hand: design and connection to electronic board**

**3. Figure S2: Optimization time for detection of solid foodstuff**

**4. Figure S3: Control experiments for glucose detection**

**5 Figure S4: Sugar detection in liquid foodstuff containing caffeine**

**Figure S1: Robotic hand: design and connection to electronic board**

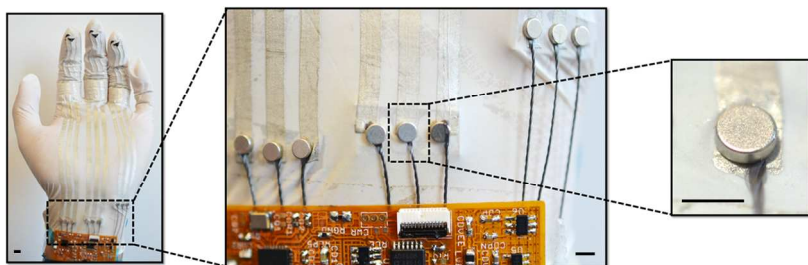

**Figure S1.** Glove based connections to PCB (scale bar, 3 mm). The cylinder-shaped neodymium magnets were used for affixing the conductive thread which connects the printed trace to the PCB.

**Figure S2: Optimization time for detection of solid foodstuff**

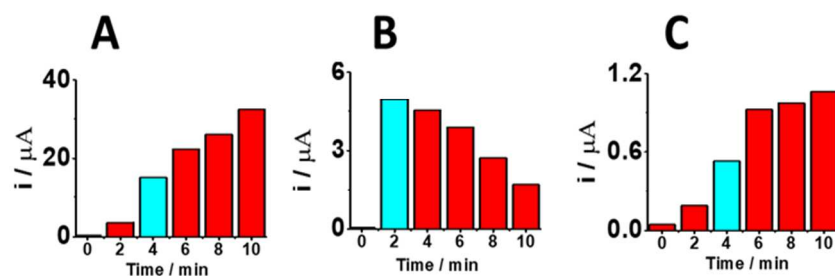

**Figure S2** Optimization of time required for diffusion of the solid sample in the agarose gel for (A) ascorbic acid, (B) glucose and (C) capsaicin detection.

**Figure S3: Control experiments for glucose detection**

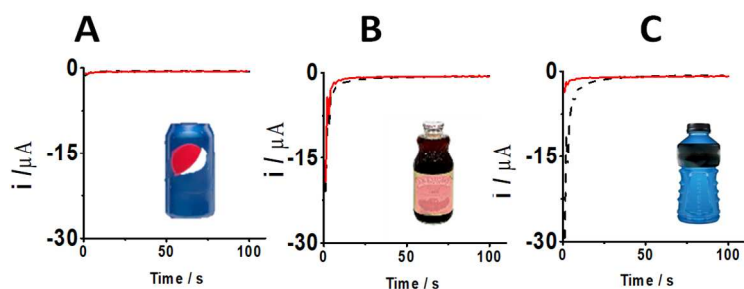

**Figure S3.** Control experiments for glucose contained in commercial beverages on gustatory sensor unmodified with  $GO_x$  for (A) coke, (B) cherry cider and (C) energy drink.

**Figure S4: Sugar detection in liquids containing caffeine**

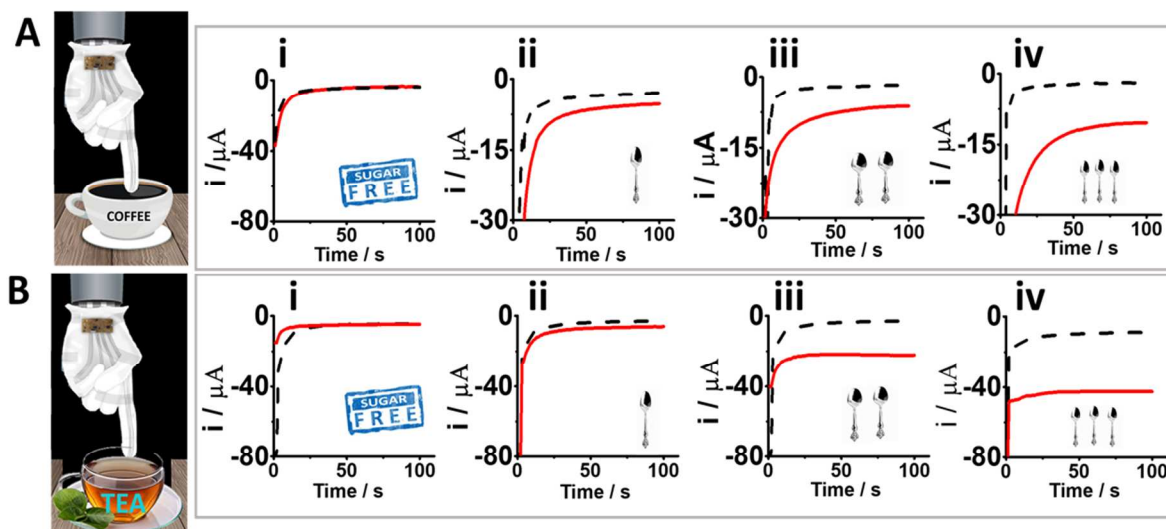

**Figure S4.** Sweetened detection in (A) coffee drink and (B) black tea containing (i) no glucose, (ii) one spoon of glucose, (iii) two spoons for glucose and (iv) three spoons of glucose.
